# Supplementary material for: Recent benthic foraminifera communities offshore of Thwaites Glacier in the Amundsen Sea, Antarctica: implications for interpretations of fossil assemblages
Source: Copernicus journal article supplement (doi:10.5194/jm-44-79-2025), 2025-03-20

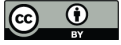

*Supplement of*

**Recent benthic foraminifera communities offshore of Thwaites Glacier in the Amundsen Sea, Antarctica: implications for interpretations of fossil assemblages**

**Asmara A. Lehrmann et al.**

*Correspondence to:* Asmara A. Lehrmann (aalehrmann@uh.edu)

The copyright of individual parts of the supplement might differ from the article licence.

Figure S1. Sections of Knudsen acoustic sub-bottom profiles across/near the studied core sites. The red line indicates the (projected) location of a core site.

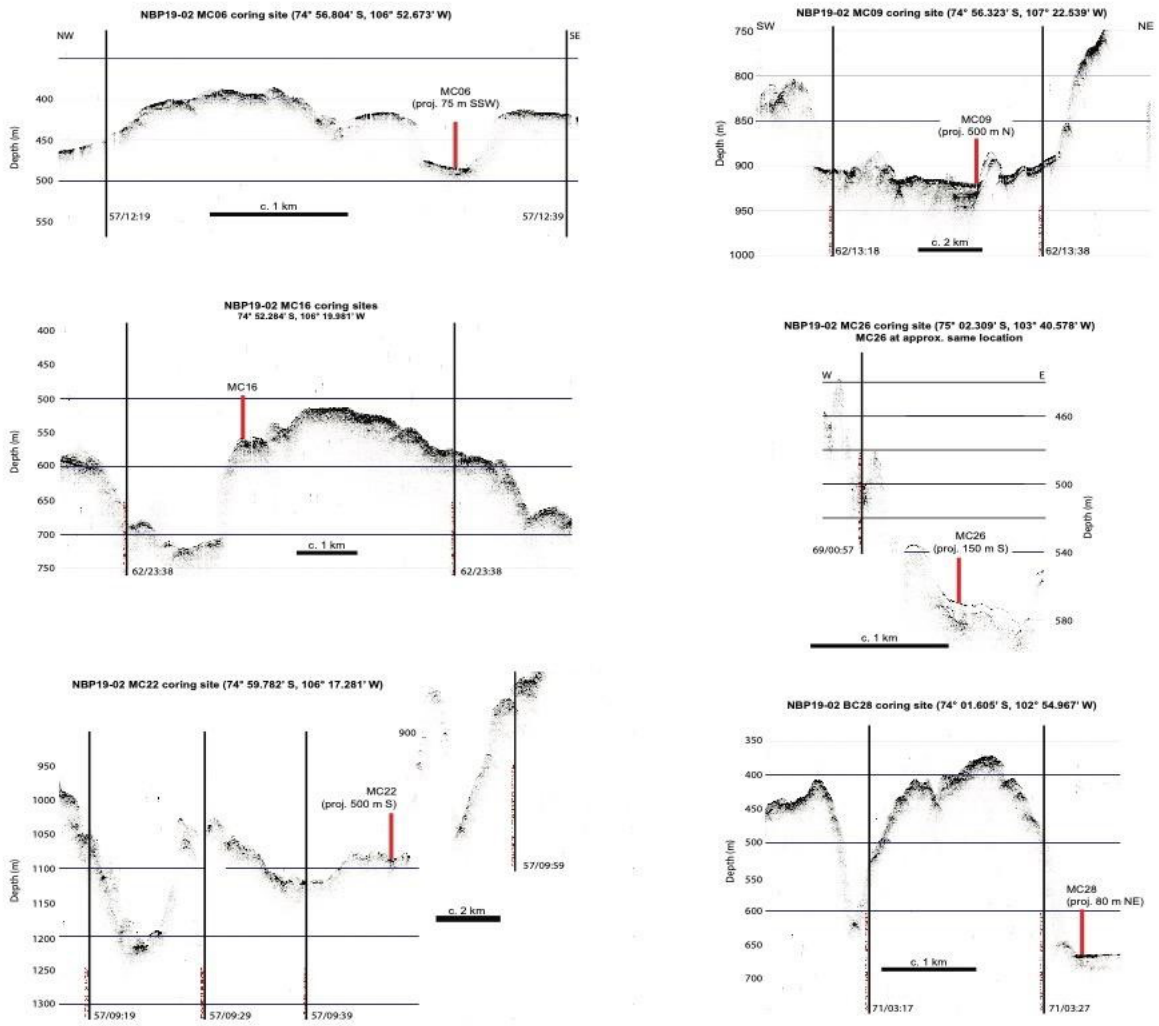

Supplement: Supplementary file 1 [file jm-44-79-2025-supplement.pdf]
